# Supplementary material
Source: PubMed Central journal article supplement (PMC4802359)
Supplement: NIHMS714367-supplement.pdf [file NIHMS714367-supplement.pdf]

## **SUPPLEMENTAL INFORMATION**

Supplemental figure 1 and 2 show data that support the main claims in the manuscript but cannot be included due to lack of space.

Supplemental table 1 lists AQUA peptides employed in this study.

Supplemental table 2 scheduled inclusion list of heavy and light irisin peptides.

SUPPLEMENTAL FIGURES

Supplemental Figure 1

Deamidated

A

| Sequence                        |            |          |          |            |    |
|---------------------------------|------------|----------|----------|------------|----|
| FIQEVNITTR                      |            |          |          |            |    |
| Predicted Fragmentation Pattern |            |          |          |            |    |
| Seq #                           | b: Δ Error | b        | y        | y: Δ Error | +1 |
| F 1                             | ---        | 148.076  | ---      | ---        | 10 |
| I 2                             | 349.410    | 261.160  | 1062.543 | ---        | 9  |
| Q 3                             | -29.583    | 389.218  | 949.459  | 53.075     | 8  |
| E 4                             | -84.799    | 518.261  | 821.400  | 3.746      | 7  |
| V 5                             | -145.249   | 617.329  | 692.357  | -18.667    | 6  |
| N 6                             | -15.445    | 732.356  | 593.289  | -75.296    | 5  |
| T 7                             | -1110.426  | 833.404  | 478.262  | -97.690    | 4  |
| T 8                             | -888.679   | 934.452  | 377.214  | 60.633     | 3  |
| T 9                             | -709.160   | 1035.499 | 276.167  | 1571.751   | 2  |
| R 10                            | ---        | ---      | 175.119  | -1257.149  | 1  |

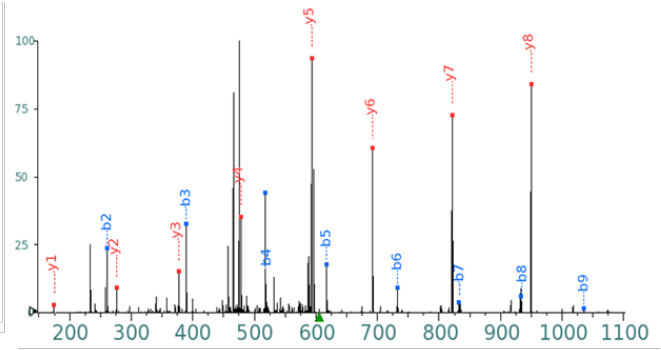

Normal asparagine

| Sequence                        |            |          |          |            |    |
|---------------------------------|------------|----------|----------|------------|----|
| FIQEVNITTR                      |            |          |          |            |    |
| Predicted Fragmentation Pattern |            |          |          |            |    |
| Seq #                           | b: Δ Error | b        | y        | y: Δ Error | +1 |
| F 1                             | ---        | 148.076  | ---      | ---        | 10 |
| I 2                             | 753.746    | 261.160  | 1061.559 | 134.780    | 9  |
| Q 3                             | -84.474    | 389.218  | 948.474  | 124.876    | 8  |
| E 4                             | -155.125   | 518.261  | 820.416  | 129.322    | 7  |
| V 5                             | 205.421    | 617.329  | 691.373  | -50.202    | 6  |
| N 6                             | 167.362    | 731.372  | 592.305  | -82.211    | 5  |
| T 7                             | 126.878    | 832.420  | 478.262  | -45.614    | 4  |
| T 8                             | -874.086   | 933.468  | 377.214  | -5.379     | 3  |
| T 9                             | ---        | 1034.515 | 276.167  | 1039.959   | 2  |
| R 10                            | ---        | ---      | 175.119  | ---        | 1  |

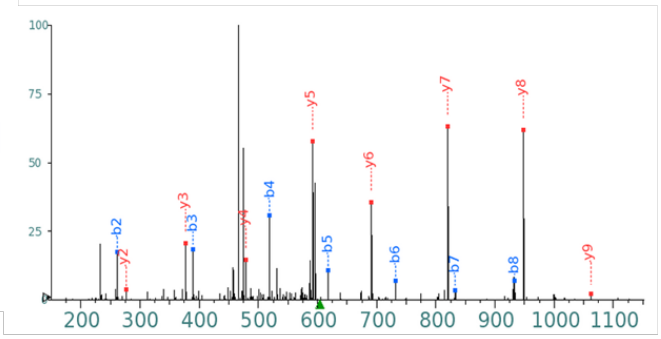

DSPSAPVNTVR

B

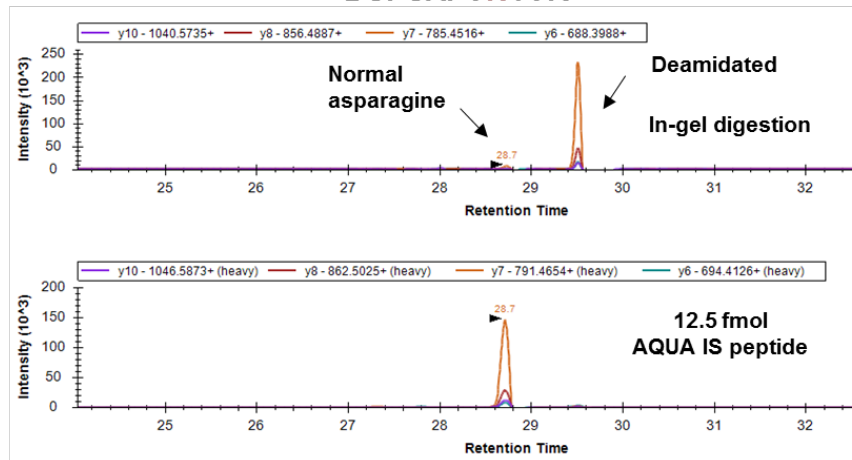

Figure S1, Related to Figure 1. Deamidated recombinant Irisin peptide spectra and n-terminal irisin PRM

(A) MS2 spectra acquired using an Orbitrap Elite mass spectrometer (CID fragmentation) and their b-, y-ion series m/z values. Mass accuracy values are given in PPMs and “@” denotes deamidation on the asparagine residue.

**(B)** PRM elution profile for n-terminal irisin peptide (DSPSPVNTVR) using Skyline software as found in sedentary subject 1. Top panel is the deamidated asparagine form of the peptide and the unmodified peptide found in the plasma. The bottom panel is 12.5 femtomoles of heavy internal standard (IS) AQUA peptide.

**Supplemental Figure 2**

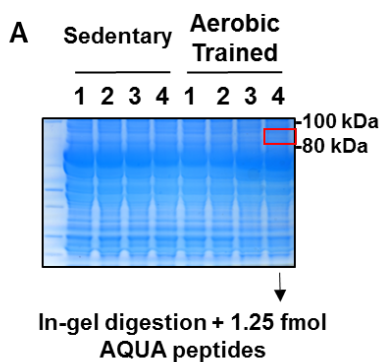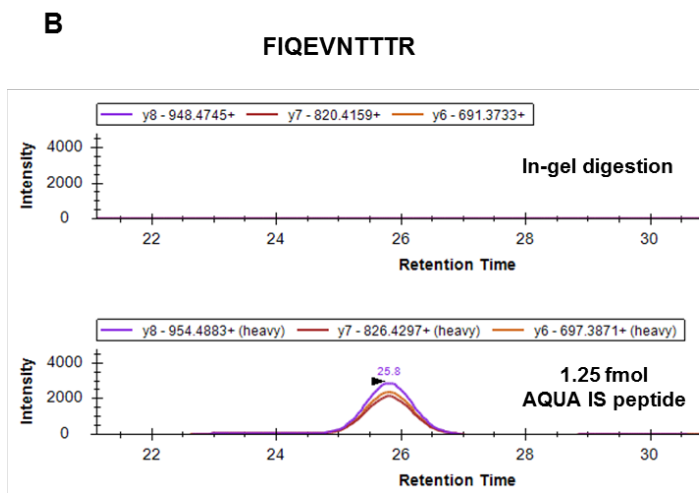

**Figure S2, Related to Figure 2. PRM of irisin from the region 80-100 kDa**

**(A)** SDS PAGE separation of 50  $\mu$ g of plasma from aerobically trained subject visualized by coomassie staining. Molecular mass regions from 80–100 kDa was excised from six separate gels (300  $\mu$ g from the original 100  $\mu$ l plasma) and digested in-gel in the presence of 1.25 femtomoles of each internal standard AQUA peptide.

**(B)** PRM elution profile for internal tryptic irisin peptide (FIQEVNTTTR) using Skyline software found in sedentary subject 1. Top panel is the PRM trace for the unmodified peptide and deamidated form of the internal irisin peptide found in the plasma and the bottom panel is 1.25 femtomoles of heavy internal standard (IS) AQUA peptide. No visible signal for irisin in the plasma in this region.

## SUPPLEMENTAL TABLES

**Table S1, Related to Experimental Procedure. AQUA peptides employed in this study**

| AQUA Peptide | Sequence     | Mass (Da) |          |
|--------------|--------------|-----------|----------|
|              |              | Light     | Heavy    |
| FNDC5 32-43  | DSPSAPVNVTVR | 1240.631  | 1246.655 |
| FNDC5 79-88  | FIQEVNTTTR   | 1207.609  | 1213.634 |

**Table S2, Related to Experimental Procedure. Scheduled inclusion list of heavy and light irisin peptides**

| Mass [m/z] | CS [z] | Start [min] | End [min] | Peptide Sequence           |
|------------|--------|-------------|-----------|----------------------------|
| 604.817    | 2      | 23.99       | 27.99     | FIQEVNTTTR (light)         |
| 607.824    | 2      | 23.99       | 27.99     | FIQEVNTTTR (heavy)         |
| 605.309    | 2      | 24.17       | 28.17     | FIQEVN[+1.0]TTTR (light)   |
| 608.316    | 2      | 24.17       | 28.17     | FIQEVN[+1.0]TTTR (heavy)   |
| 621.327    | 2      | 27.82       | 31.82     | DSPSAPVNVTVR (light)       |
| 624.334    | 2      | 27.82       | 31.82     | DSPSAPVNVTVR (heavy)       |
| 621.819    | 2      | 27.13       | 31.13     | DSPSAPVN[+1.0]VTVR (light) |
| 624.826    | 2      | 27.13       | 31.13     | DSPSAPVN[+1.0]VTVR (heavy) |

**CS Charge state**
